# Supplementary material for: Water-Floating Hydrogel Polymer Microsphere Composites for Application in Hydrological Mining of Cu(II) Ions
Source: MDPI journal article supplement (doi:10.3390/nano13192619), 2023-09-22
Supplement: s1 [file s1]

## Supporting Information

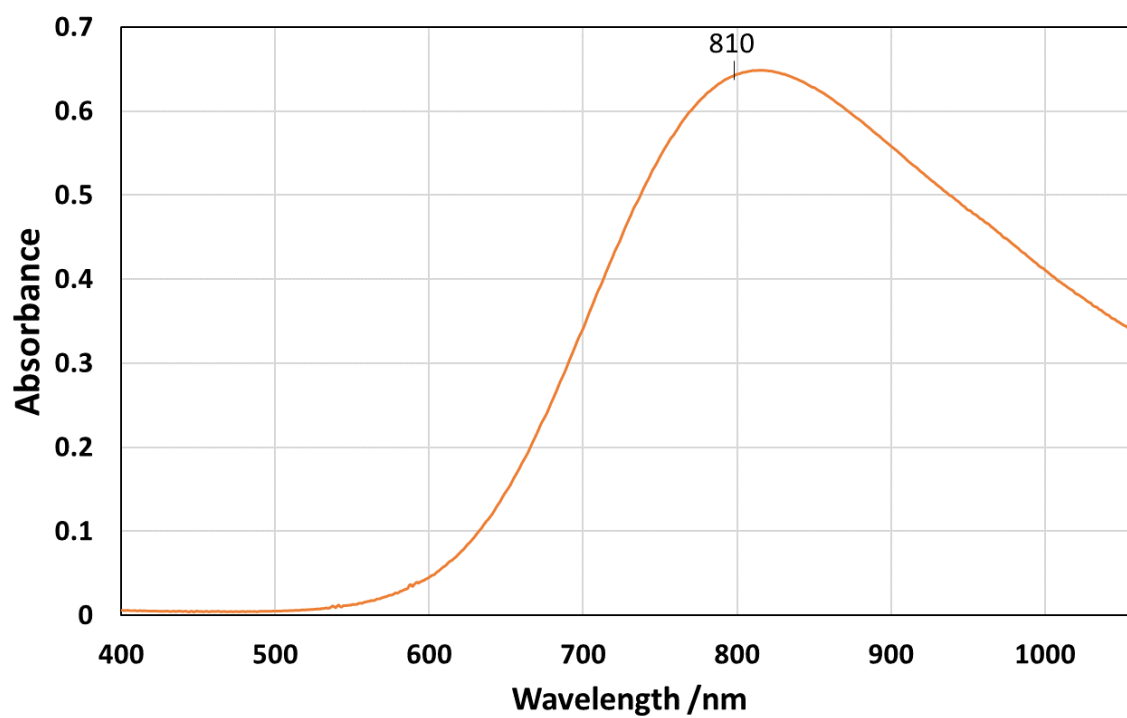

**Figure S1.** UV-vis absorption spectrum of  $5 \times 10^{-2}$  M  $\text{CuCl}_2 \cdot 2\text{H}_2\text{O}$  solution.

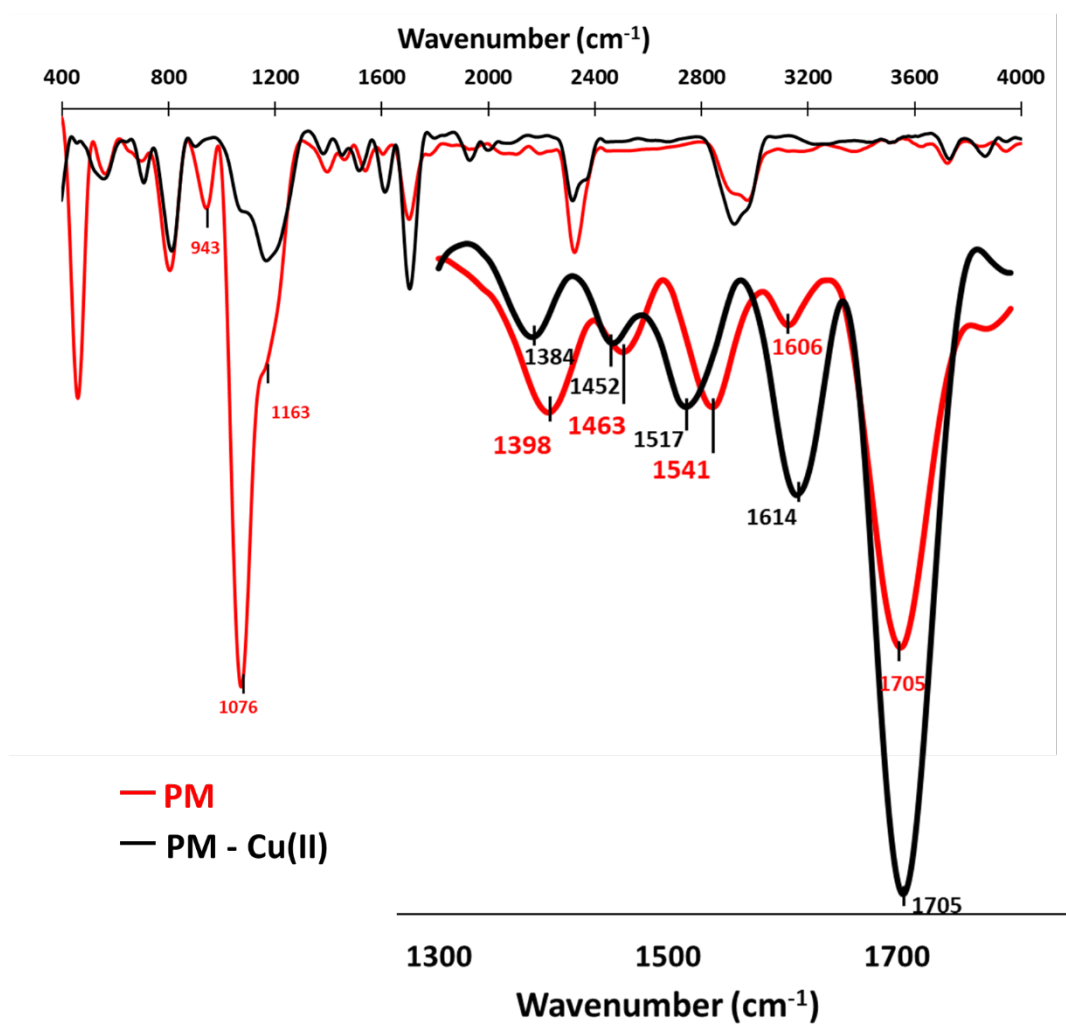

**Figure S2.** ATR-FTIR spectra of the PMs before and after adsorption of Cu(II) ions.

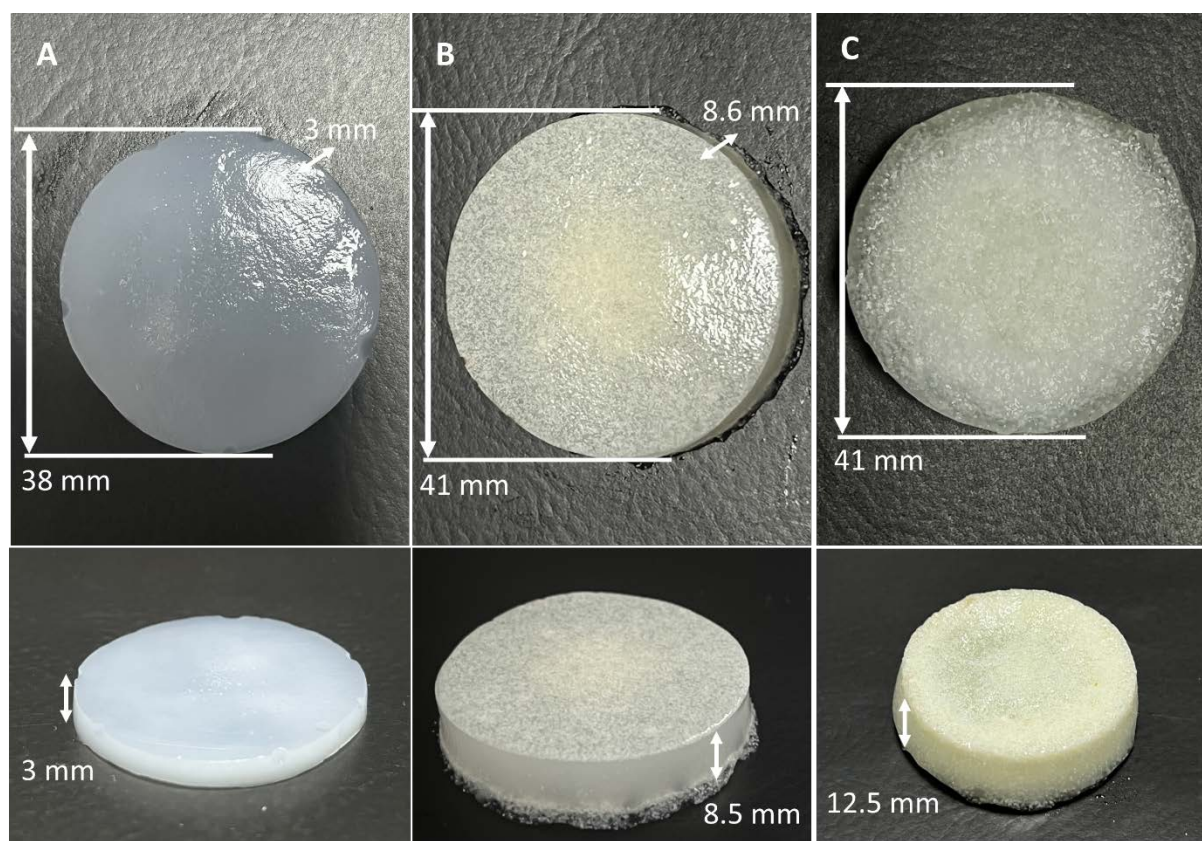

**Figure S3.** Photograph of the PVA hydrogel (A) and of the hydrogel-polymer microsphere (HPM) composite HAM-2 (B) and of the foamed HPM composite FAM-2 (C).

**Table S1.** Composition of the HPM composite series in the form of hydrogel and foam.

| Sample        | PVA (g) | Glycerol (g) | Microspheres (g) | Dry mass (g) | Observations    |
|---------------|---------|--------------|------------------|--------------|-----------------|
| PVA -Hydrogel | 0.45    | 0.9          | -                | 1.35         | hydrogel        |
| HAM-1         | 0.45    | 0.9          | 0.45             | 1.8          | hydrogel        |
| HAM-2         | 0.45    | 0.9          | 1                | 2.35         | hydrogel        |
| FAM-1         | 0.45    | 0.9          | 0.45             | 1.8          | hydrogel - foam |
| FAM-2         | 0.45    | 0.9          | 1                | 2.35         | hydrogel - foam |

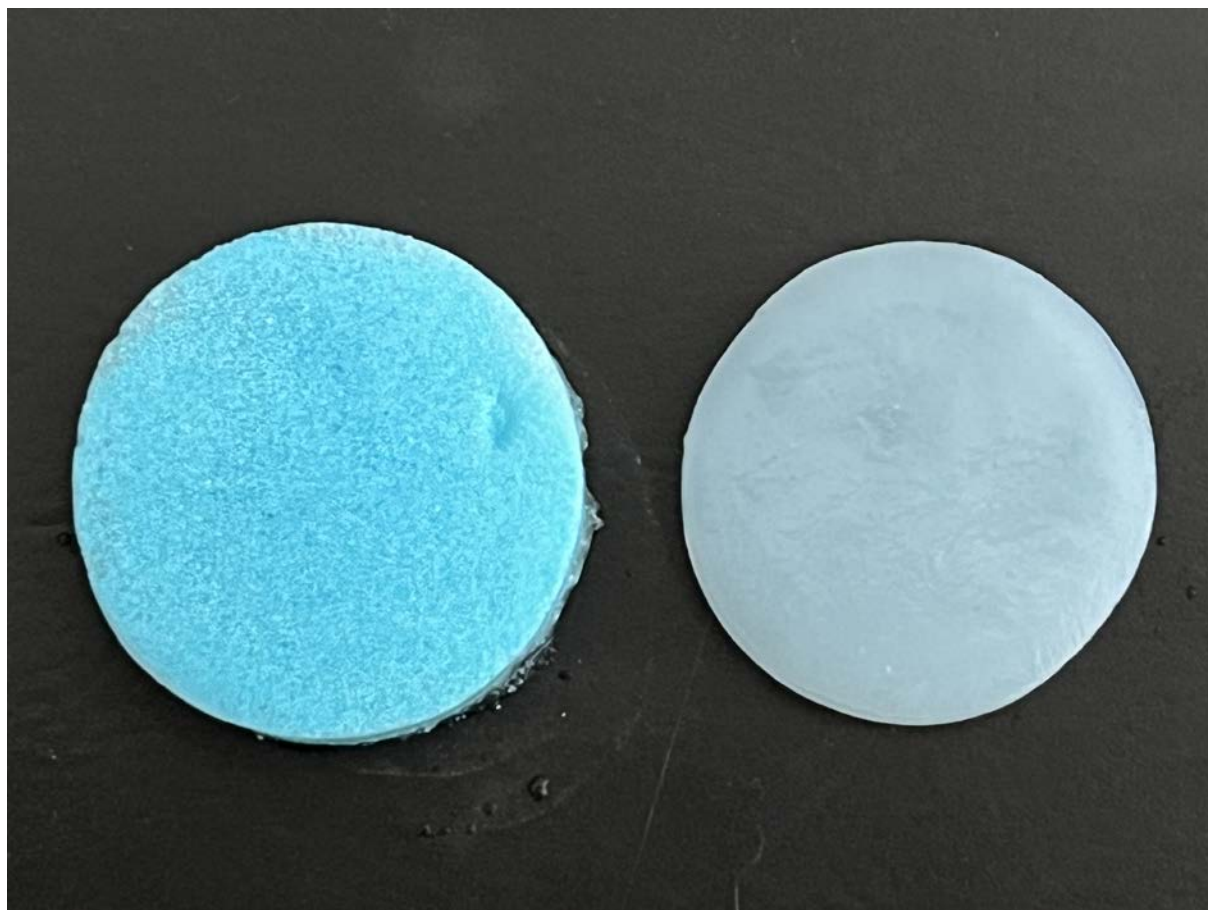

**Figure S4.** Photograph of the HAM-1 (left) and PVA hydrogel control sample without adsorbent microspheres (right) after being in contact with a stock solution of  $5 \times 10^{-2}$  M  $\text{CuCl}_2 \cdot 2\text{H}_2\text{O}$  for 12 hours, showing significant change in color from white to deep blue.

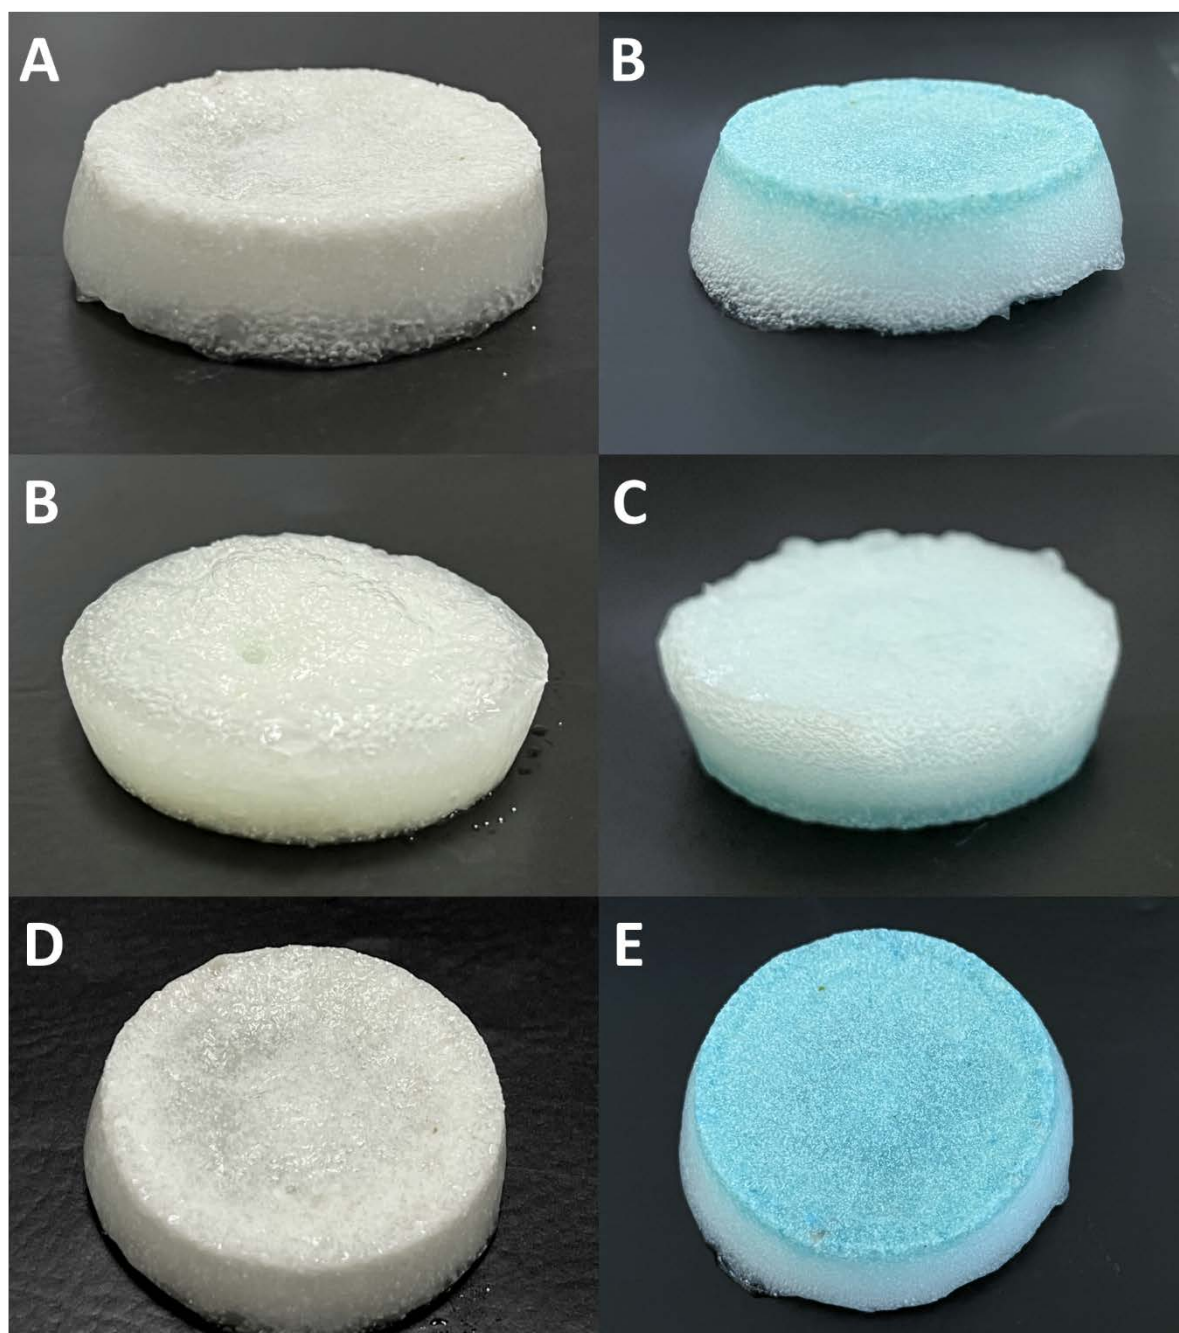

**Figure S5.** Photograph of the FAM-2 HPM composites, before and after adsorption of Cu(II) ions from a  $5 \times 10^{-2}$  M solution of  $\text{CuCl}_2 \cdot 2\text{H}_2\text{O}$ .

**Table S2.** The fit parameters of the kinetic adsorption of Cu(II) ions by the HAM-2 and FAM-2 to three different models, as indicated by the equations in the text and  $r$  represents the goodness-of-fit parameter.

| Sample | pseudo 1 <sup>st</sup> order |        |      | pseudo 2 <sup>nd</sup> order |        |      | diffusive model |      |      |
|--------|------------------------------|--------|------|------------------------------|--------|------|-----------------|------|------|
|        | $q_e$                        | $k_1$  | $r$  | $q_e$                        | $k_2$  | $r$  | $k_p$           | $C$  | $r$  |
| HAM-2  | 44.15                        | 0.0155 | 0.98 | 58.29                        | 0.0002 | 0.98 | 3.18            | 0.00 | 0.95 |
| FAM-2  | 36.87                        | 0.0063 | 0.95 | 54.37                        | 0.0001 | 0.96 | 1.76            | 0.00 | 0.96 |
